# Supplementary material
Source: PubMed Central journal article supplement (PMC2912468)
Supplement: msq018_3.pdf [file msq018_3.pdf]

**Figure S3**

**A) Exon 1**

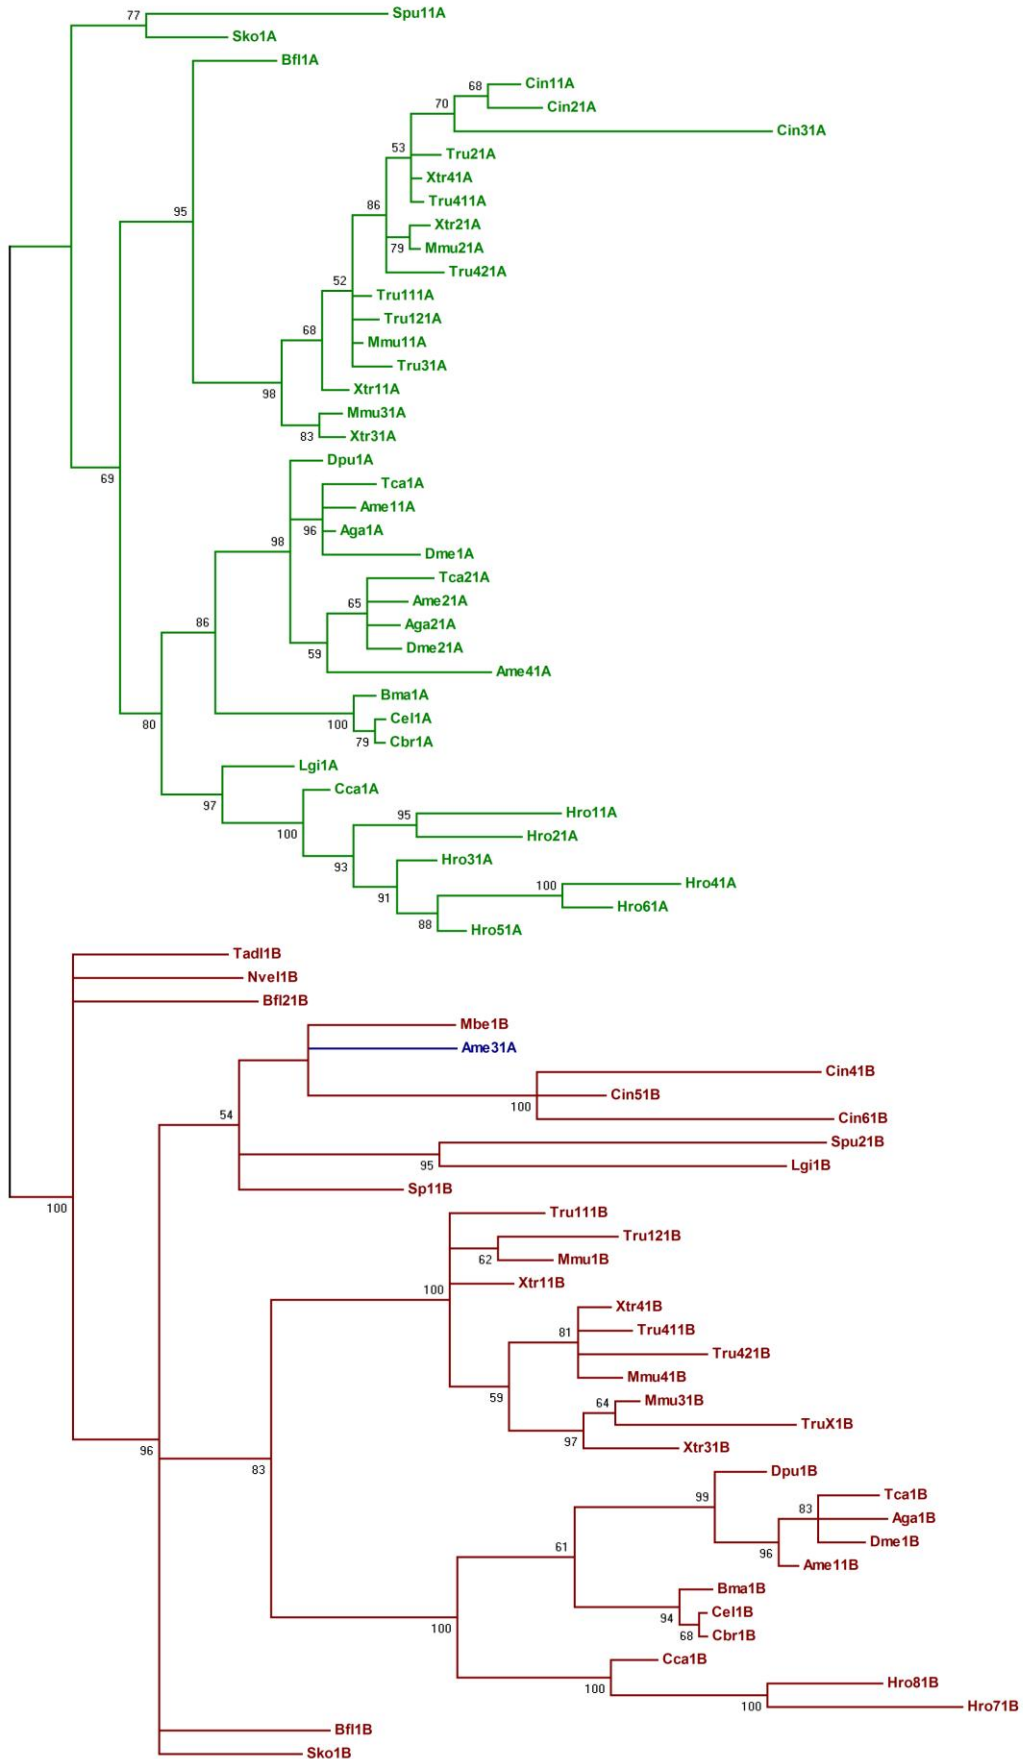

**B) Exon 2**

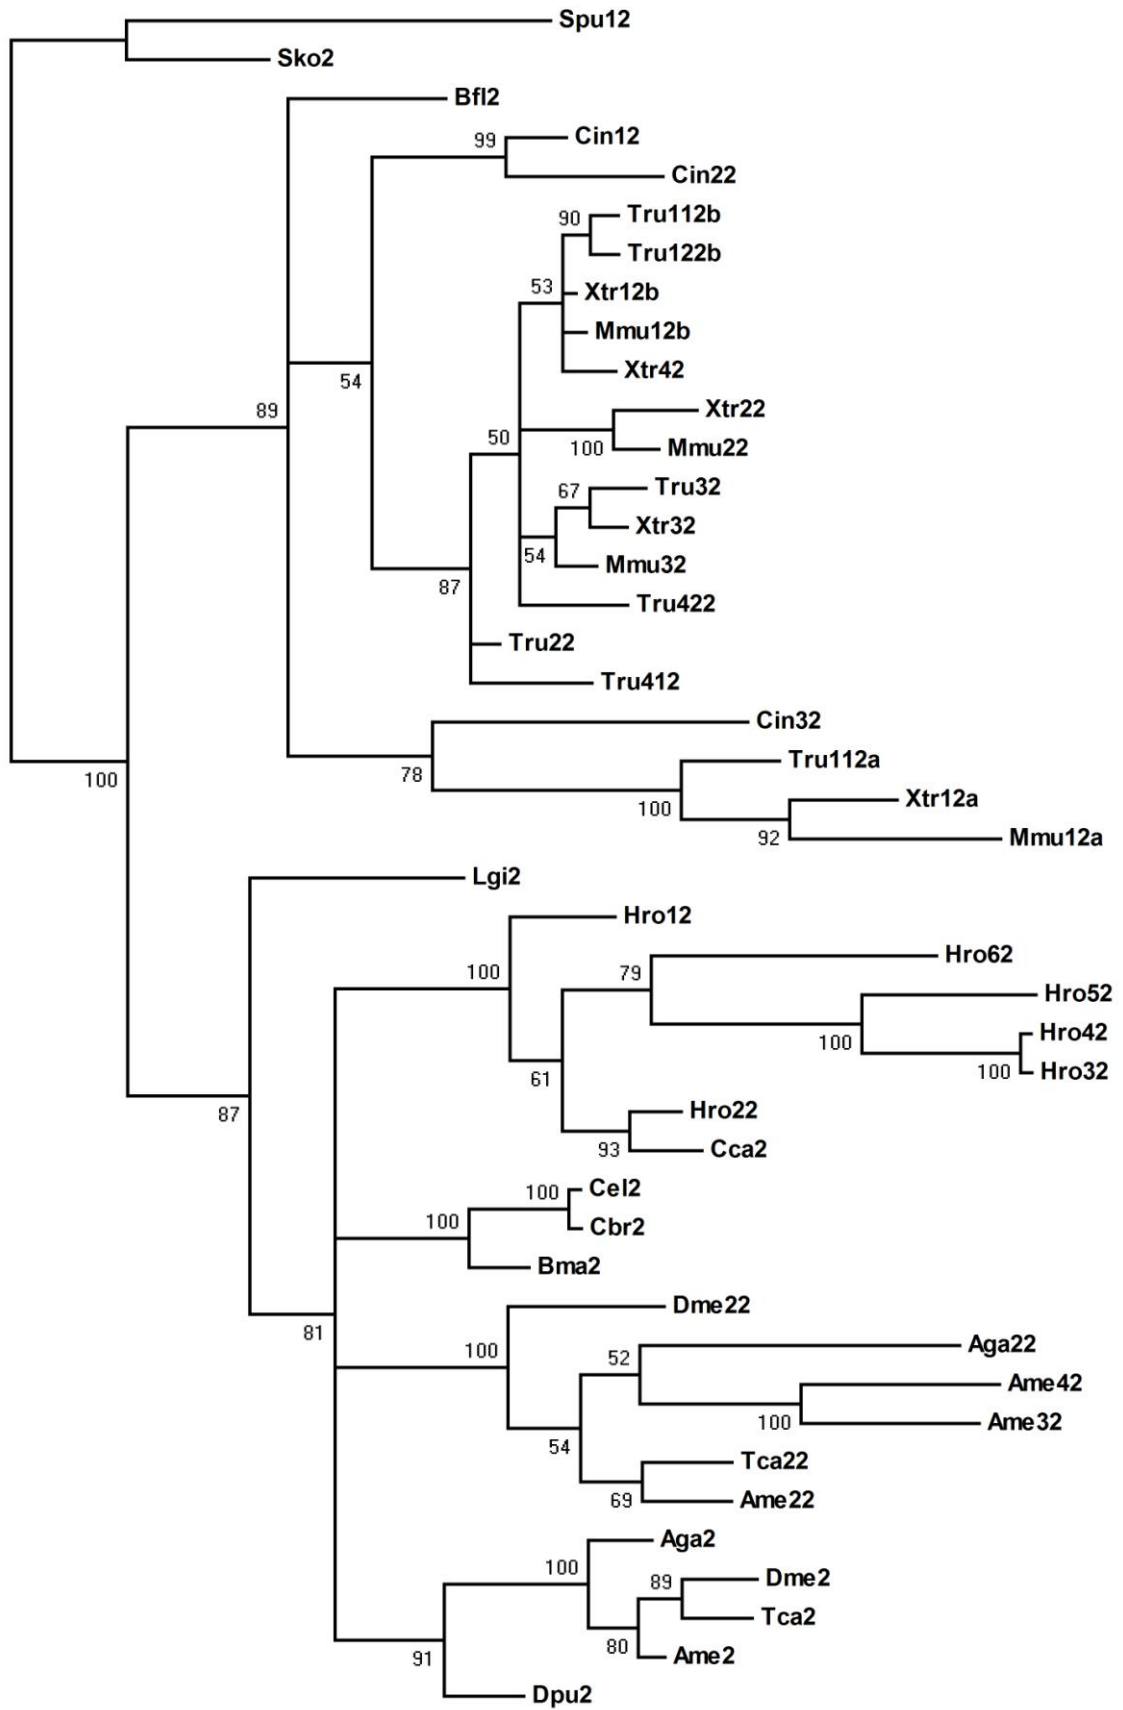

C) Exon 3

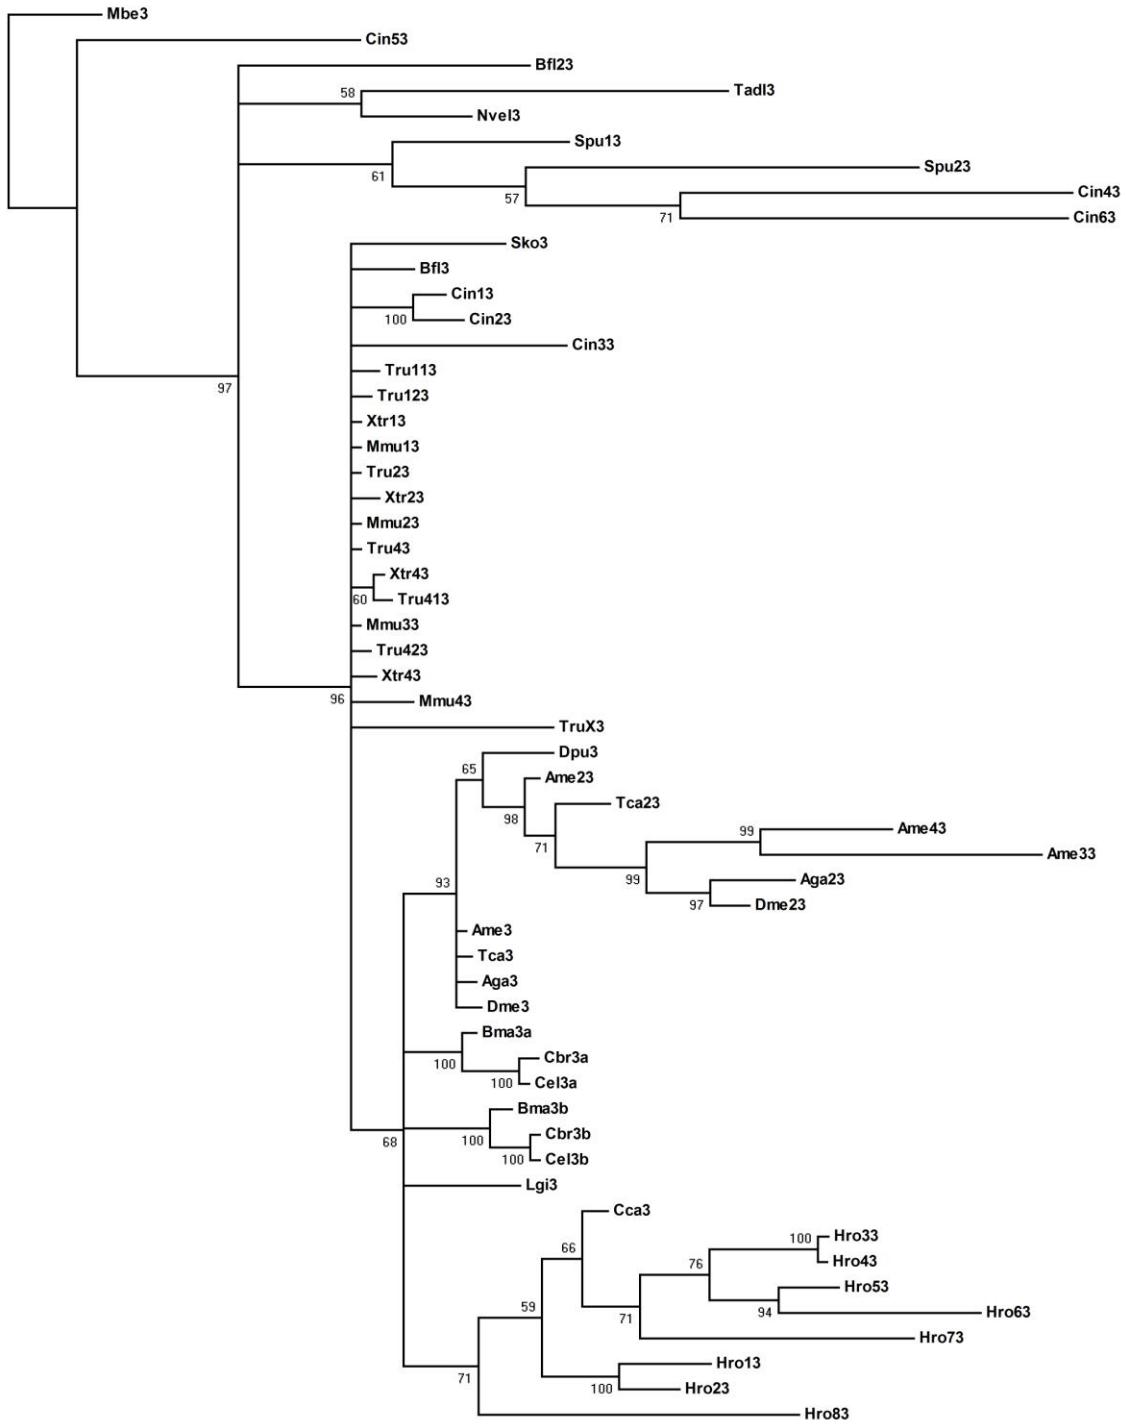

D) Exon 4.1

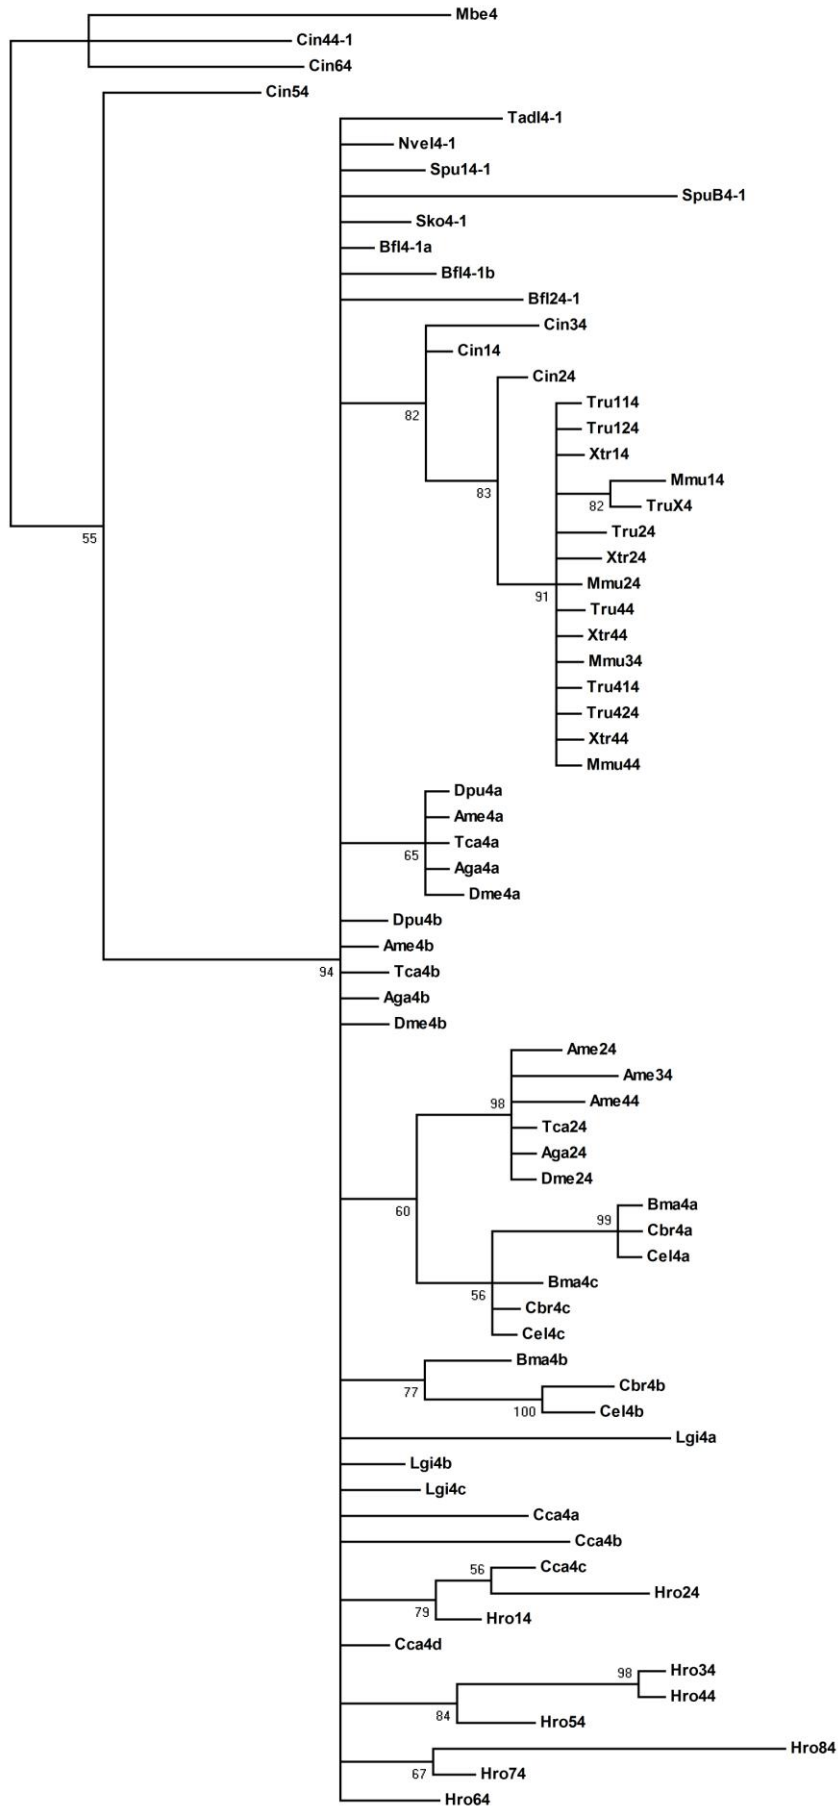

E) Exon 4.2

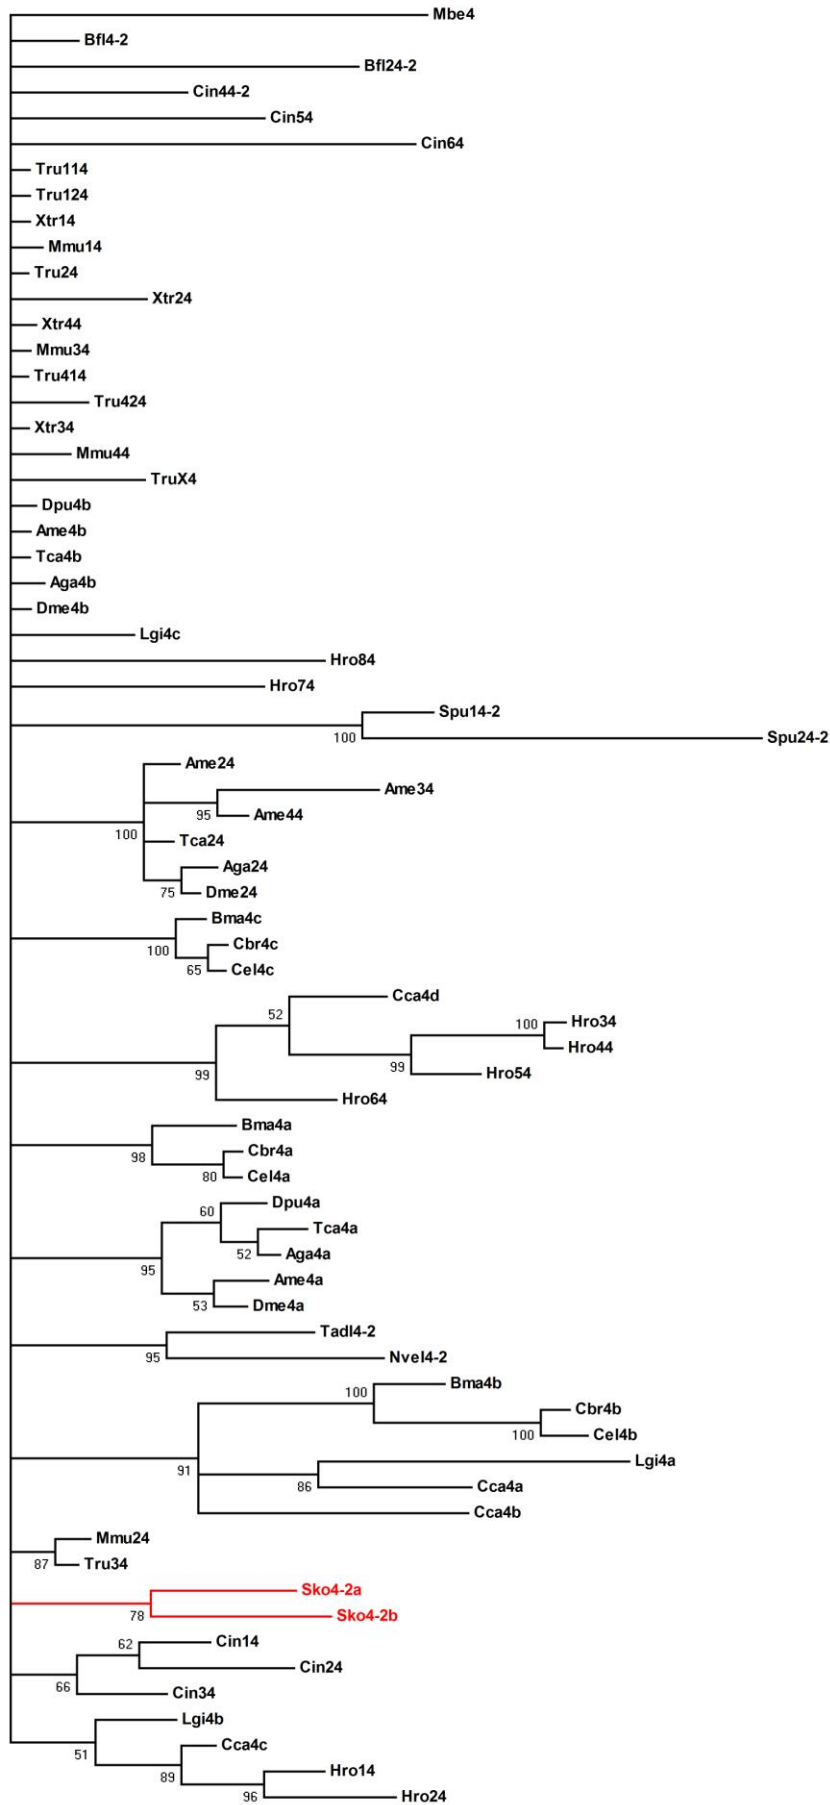

F) Exon 5

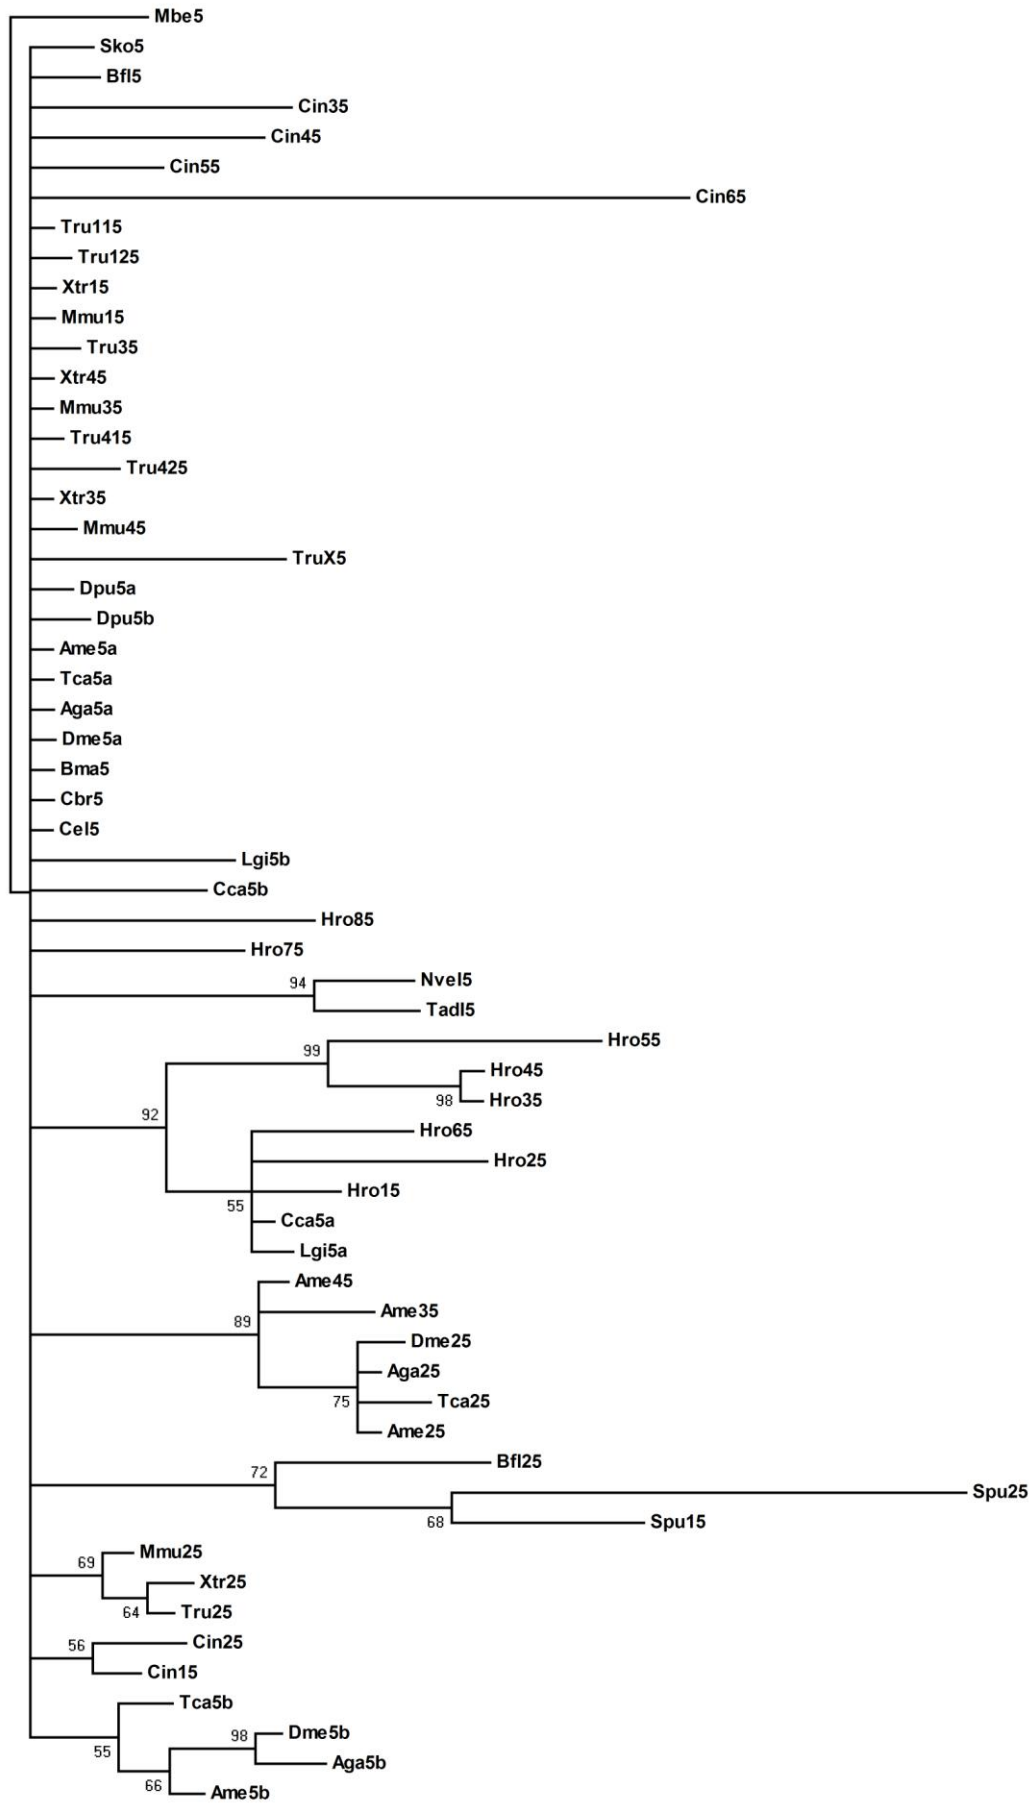

G) Exon 6

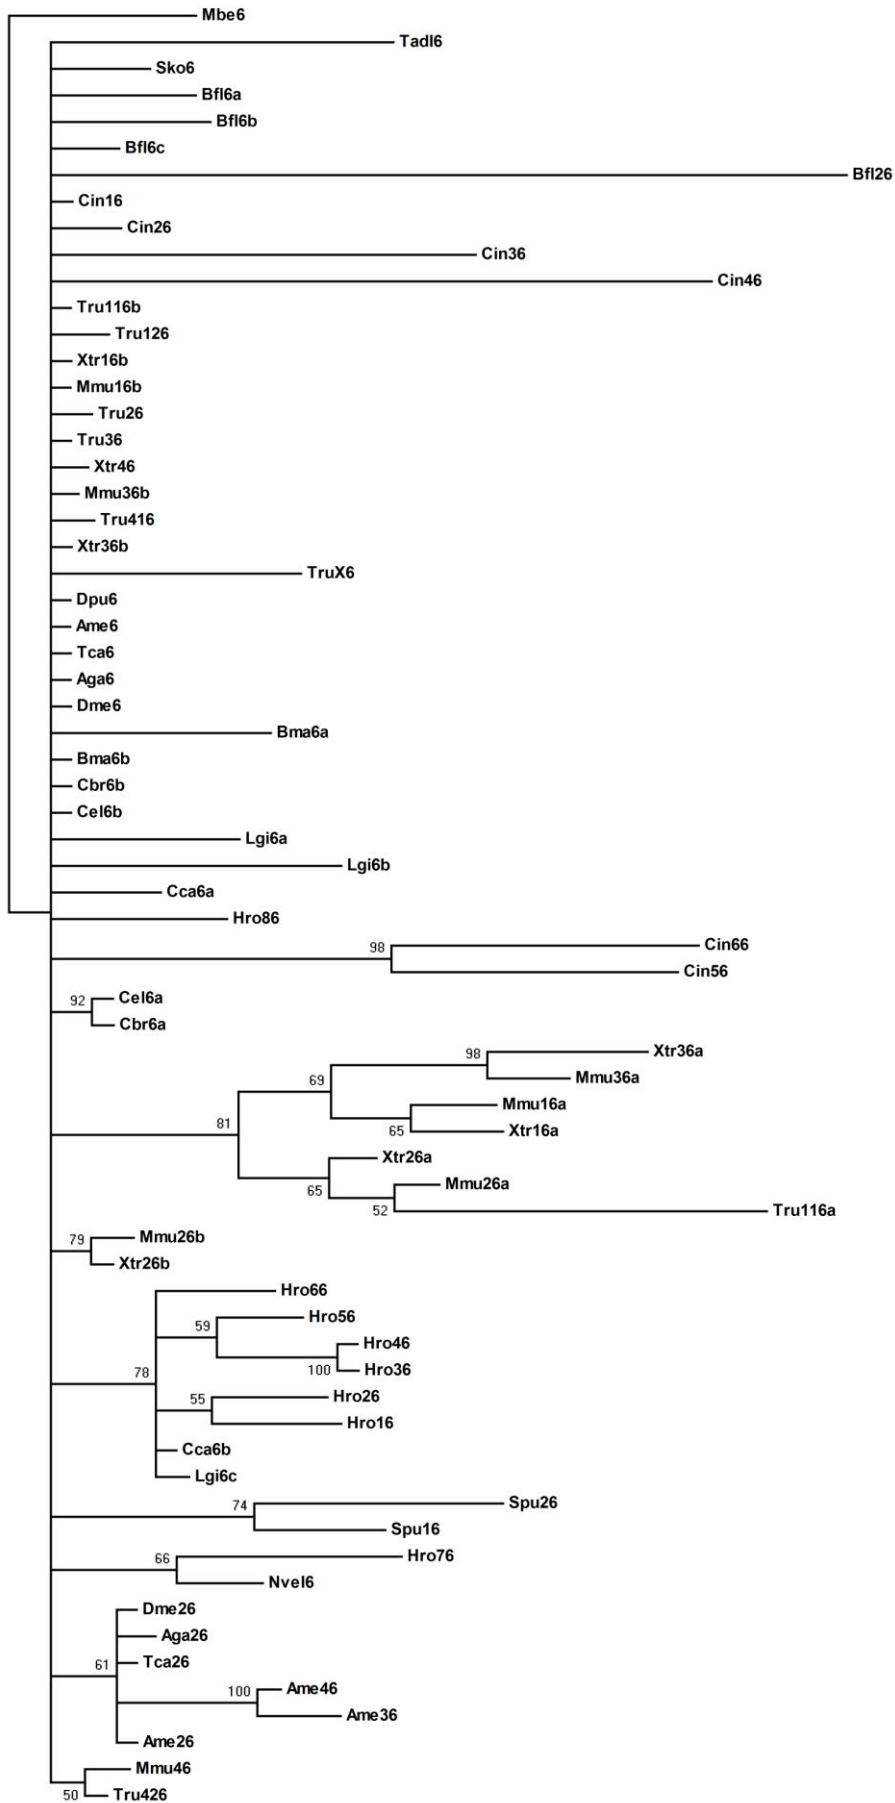

H) Exon 7

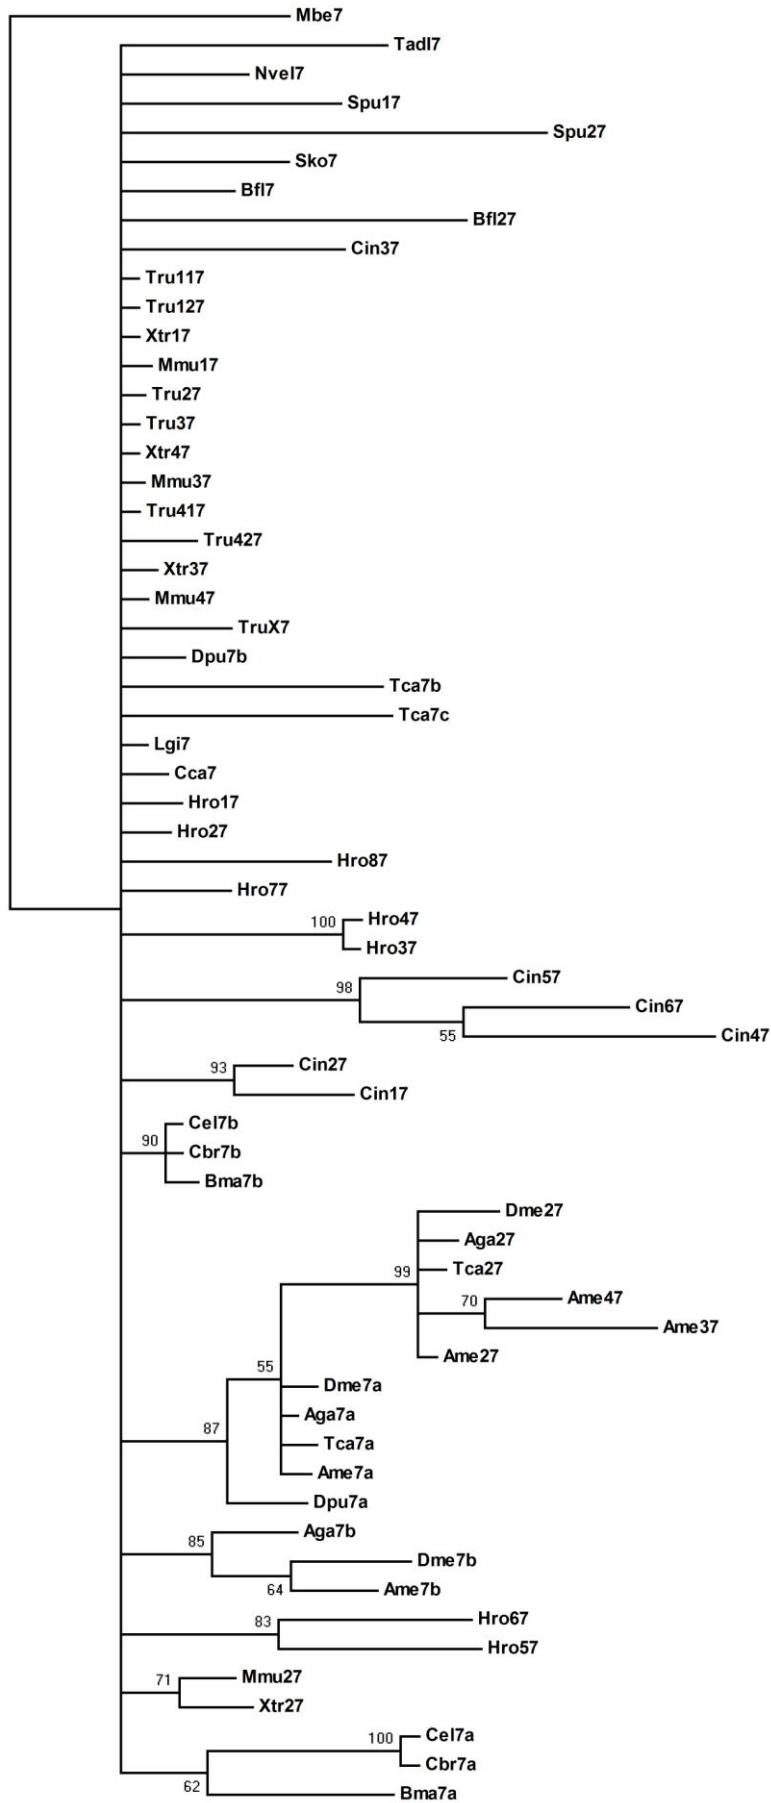



I) Exon 8

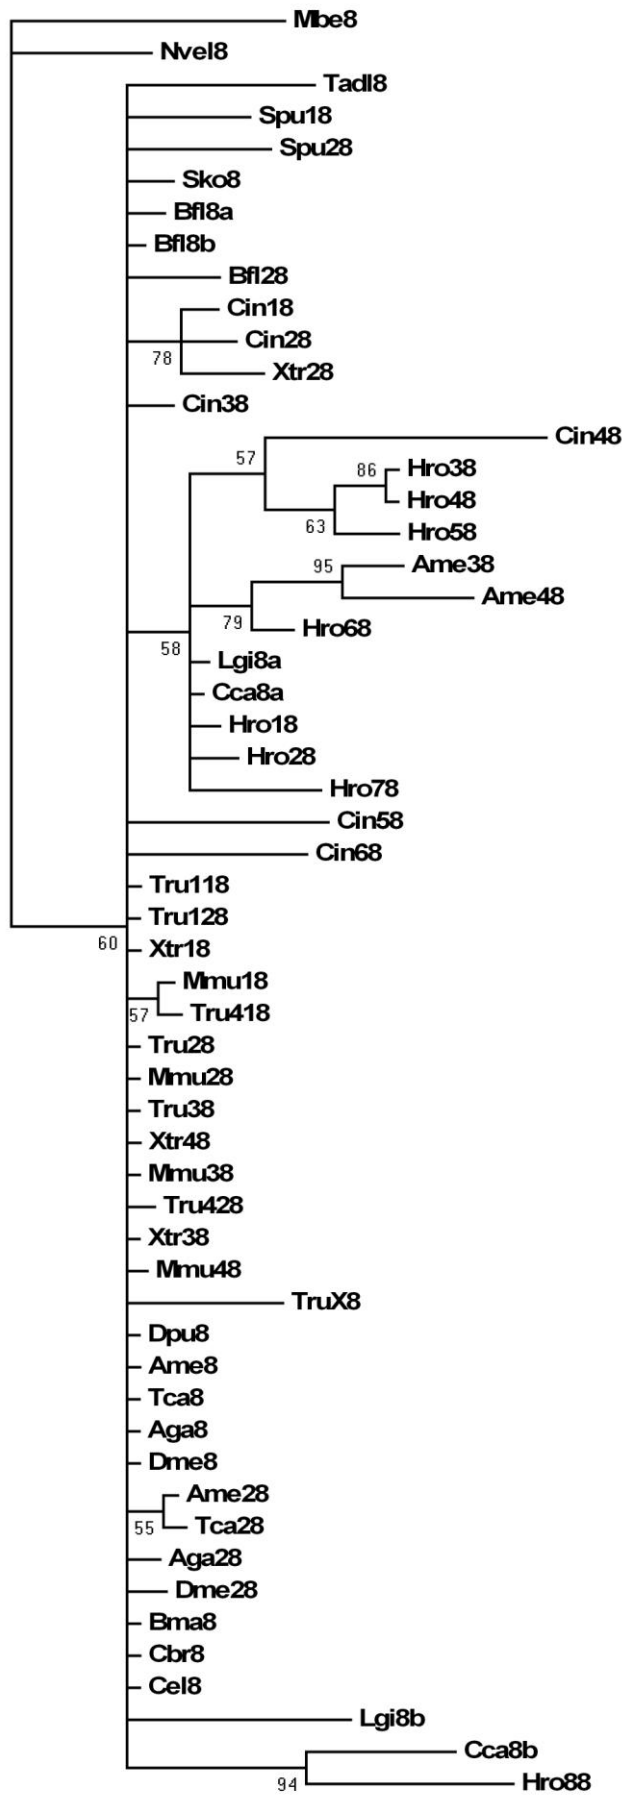

J) Exon 9

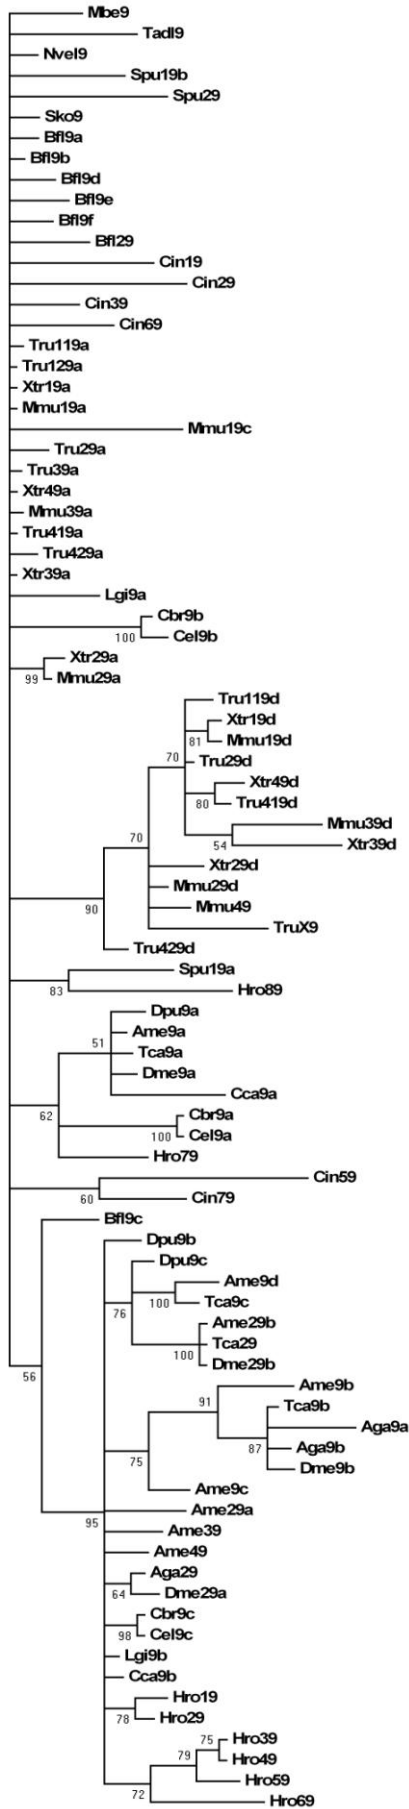

**Figure S3 - Phylogenetic analysis of the 10 ancestral *TPM* exons.**

A) Bayesian inference tree of exons 1A and 1B estimated under the RtRev +  $\Gamma$  model as recommended by Prottest. B) Bayesian inference tree of exons 2 estimated under the RtRev +  $\Gamma$  model as recommended by Prottest. C) Bayesian inference tree of exons 3 estimated under the RtRev +  $\Gamma$  model as recommended by Prottest. D) Bayesian inference tree of exons 4.1 estimated under the JTT +  $\Gamma$  model as recommended by Prottest. E) Bayesian inference tree of exons 4.2 estimated under the JTT +  $\Gamma$  model as recommended by Prottest. F) Bayesian inference tree of exons 5 estimated under the JTT +  $\Gamma$  model as recommended by Prottest. G) Bayesian inference tree of exons 6 estimated under the JTT +  $\Gamma$  model as recommended by Prottest. H) Bayesian inference tree of exons 7 estimated under the RtRev +  $\Gamma$  model as recommended by Prottest. I) Bayesian inference tree of exons 8 estimated under the RtRev + I +  $\Gamma$  model as recommended by Prottest. J) Bayesian inference tree of exons 9 estimated under the JTT +  $\Gamma$  model as recommended by Prottest. Each taxon name includes the number of the *TPM* paralog within a given species (if any) followed by the number of the MATE exon, e. g. Tru119d corresponds to the MATE exon 9d of the *TPM1.1* of *Takifugu rubripes*. Species are abbreviated as follows: Aga, *Anopheles gambiae*; Ame, *Apis mellifera*; Bf, *Branchiostoma floridae*; Bma, *Brugia malayi*; Cbr, *Caenorhabditis briggsae*; Cca, *Capitella capitata*; Cel, *Caenorhabditis elegans*; Cin, *Ciona intestinalis*; Dme, *Drosophila melanogaster*; Dpu, *Daphnia pulex*; Hro, *Helobdella robusta*; Lgi, *Lottia gigantea*; Mbr, *Monosiga brevicollis*; Mmu, *Mus musculus*; Nve, *Nematostella vectensis*; Sko, *Saccoglossus kowalevskii*; Spu, *Strongylocentrotus purpuratus*; Tad, *Trichoplax adhaerens*; Tca, *Tribolium castaneum*; Tru, *Takifugu rubripes*; and Xtr, *Xenopus tropicalis*. Numbers next to the nodes indicate posterior probabilities.
